# Supplementary material for: Effects of metformin on survival outcomes of pancreatic cancer: a meta-analysis
Source: PubMed Central journal article supplement (PMC5589674; doi:10.18632/oncotarget.18233), 2017-05-26
Supplement: oncotarget-08-55478-s001.pdf [file oncotarget-08-55478-s001.pdf]

# Effects of metformin on survival outcomes of pancreatic cancer: a meta-analysis

## SUPPLEMENTARY INFORMATION

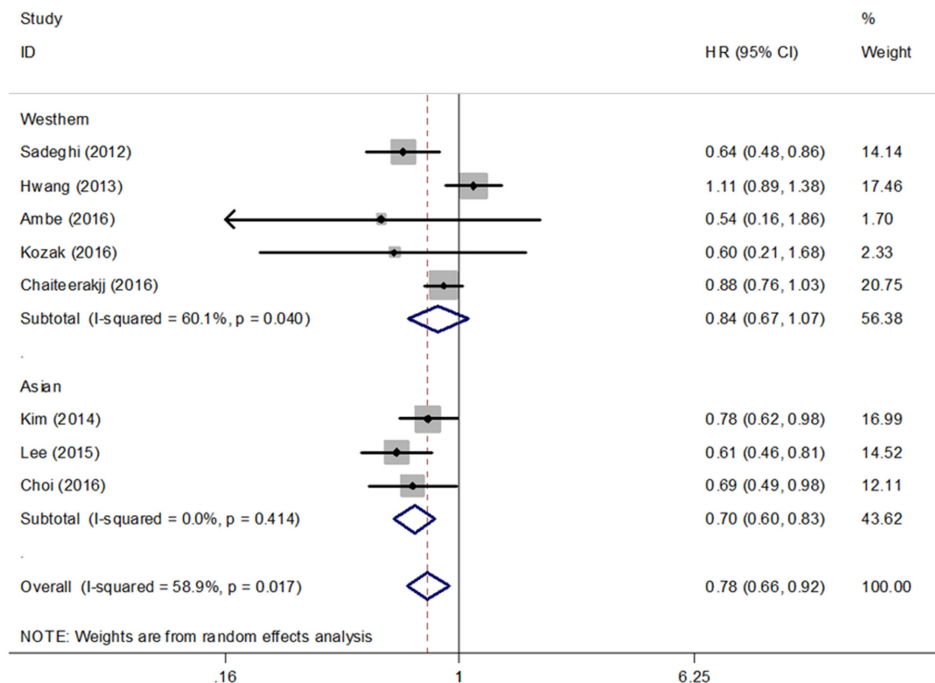

**Supplementary Figure 1: Sub-group analysis of the effect of metformin on overall survival of pancreatic cancer in cohort studies.** HR: hazard ratio; CI: confidence interval.

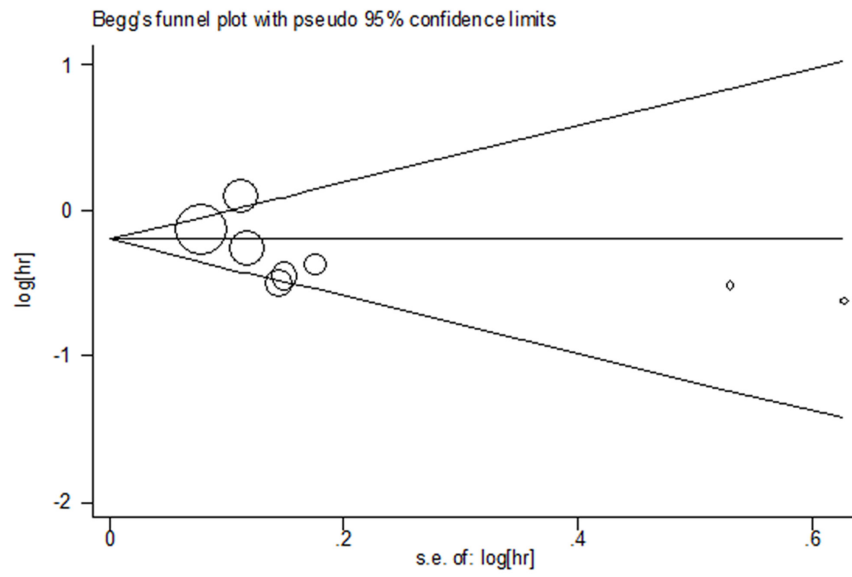

Supplementary Figure 2: Begg's funnel plots for publication bias test for cohort studies.

**Supplementary File 3: PRISMA Checklist**

See Supplementary File 1
